# Supplementary material for: Formation of CdMoO4 porous hollow nanospheres via a self-assembly accompanied with Ostwald ripening process and their photocatalytic performance
Source: Royal Society of Chemistry journal article supplement (doi:10.1039/c3ce41562g), 2013-01-01
Supplement: c3ce41562g.pdf [file c3ce41562g.pdf]

Supporting Information

## Formation of CdMoO<sub>4</sub> porous hollow nanospheres via a self-assembly accompanied with Ostwald ripening process and their photocatalytic performance

Wen-Shou Wang,<sup>a,b,c</sup> Liang Zhen,<sup>\*, a,c</sup> Cheng-Yan Xu,<sup>a,c</sup> Wen-Zhu Shao,<sup>a</sup> and Zhong-Lin Chen<sup>b</sup>

<sup>a</sup> School of Materials Science and Engineering, Harbin Institute of Technology, Harbin 150001, China.

<sup>b</sup> State Key Laboratory of Urban Water Resources and Environment, School of Municipal & Environmental Engineering, Harbin Institute of Technology, Harbin 150090, China.

<sup>c</sup> MOE Key Laboratory of Micro-systems and Micro-structures Manufacturing, Harbin Institute of Technology, Harbin 150001, China

E-mail: [lzhen@hit.edu.cn](mailto:lzhen@hit.edu.cn), Tel: +86-451-86412133; Fax: +86-451-86413922

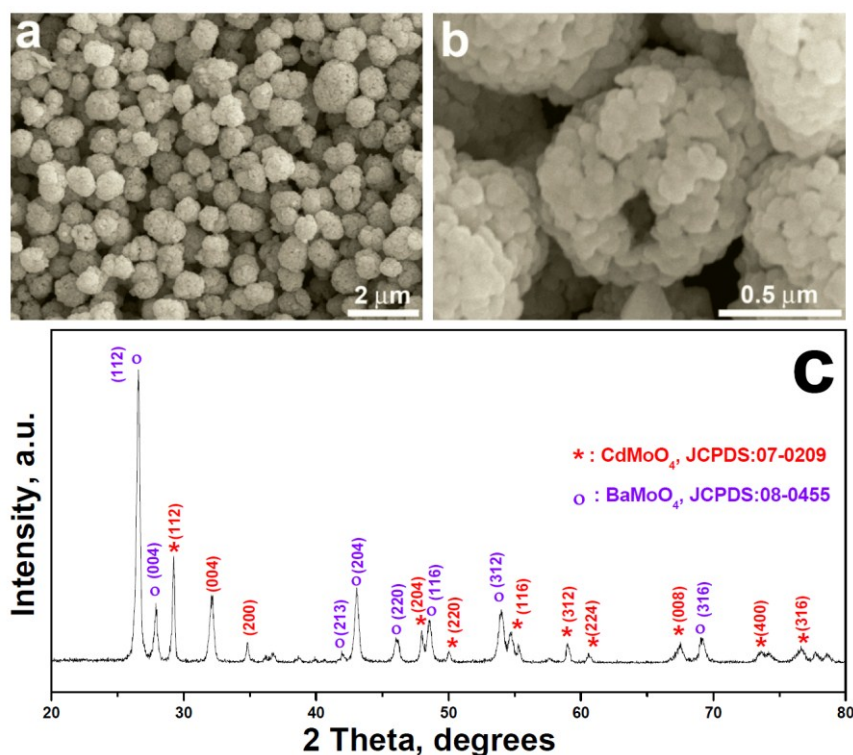

**Supporting Information, Figure S1.** SEM images and XRD pattern of Ba<sub>1-x</sub>Cd<sub>x</sub>MoO<sub>4</sub> (x = 0.2) porous hollow nanospheres.

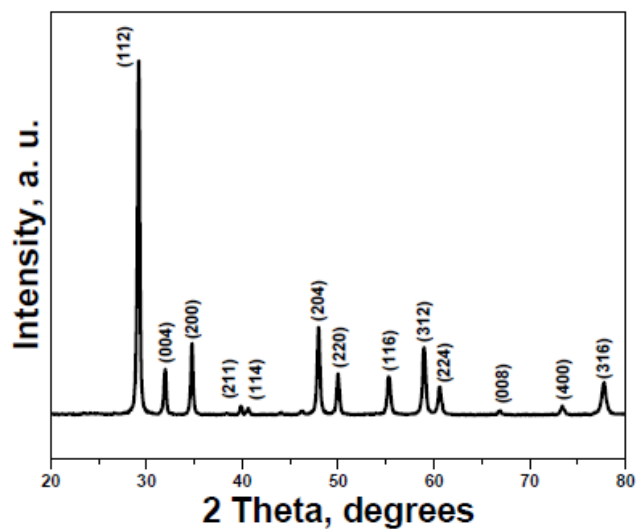

**Supporting Information, Figure S2.** XRD pattern of CdMoO<sub>4</sub> porous hollow nanospheres after calcination at 300 °C for 2 h.
